# Supplementary material
Source: Springer Nature journal article supplement (https://www.springermedizin.de/resource/supplementary/13601_2014_1061_MOESM3_ESM.pdf/9678612)
Supplement: MOESM3 [file 9678612]



Higher  
risk

nsLTPs

(Pru p 3, Cor a 8, Jug r 3, Ara h 9, Tri a 14)

Storage proteins

(Ara h 1, Ara h 2, Ara h 3, Cor a 9, Cor a 14, Jug r 1,  
Jug r 2, Gly m 5, Gly m 6)

PR10 (Gly m 4)

Wheat  $\omega$ 5-gliadin (Tri a 19)

Profilins (Cor a 2, Pru p 4, Mal d 4, Cuc m 2, Dau c 4)

PR-10 (Ara h 8, Cor a 1, Mal d 1, Cuc m1, Dau c 1)

CCD



Lower  
risk
